# Ectopic Expression of *GsPPCK3* and *SCMRP* in *Medicago sativa* Enhances Plant Alkaline Stress Tolerance and Methionine Content

Mingzhe Sun<sup>1</sup>, Xiaoli Sun<sup>1</sup>, Yang Zhao, Chaoyue Zhao, Huizi DuanMu, Yang Yu, Wei Ji, Yanming Zhu\*

Key Laboratory of Agricultural Biological Functional Gene, Northeast Agricultural University, Harbin, P.R. China

## Abstract

So far, it has been suggested that phosphoenolpyruvate carboxylases (PEPCs) and PEPC kinases (PPCKs) fulfill several important non-photosynthetic functions. However, the biological functions of soybean PPCKs, especially in alkali stress response, are not yet well known. In previous studies, we constructed a *Glycine soja* transcriptional profile, and identified three PPCK genes (*GsPPCK1*, *GsPPCK2* and *GsPPCK3*) as potential alkali stress responsive genes. In this study, we confirmed the induced expression of *GsPPCK3* under alkali stress and investigated its tissue expression specificity by using quantitative real-time PCR analysis. Then we ectopically expressed *GsPPCK3* in *Medicago sativa* and found that *GsPPCK3* overexpression improved plant alkali tolerance, as evidenced by lower levels of relative ion leakage and MDA content and higher levels of chlorophyll content and root activity. In this respect, we further co-transformed the *GsPPCK3* and *SCMRP* genes into alfalfa, and demonstrated the increased alkali tolerance of *GsPPCK3-SCMRP* transgenic lines. Further investigation revealed that *GsPPCK3-SCMRP* co-overexpression promoted the PEPC activity, net photosynthetic rate and citric acid content of transgenic alfalfa under alkali stress. Moreover, we also observed the up-regulated expression of *PEPC*, *CS* (citrate synthase), *H<sup>+</sup>-ATPase* and *NADP-ME* genes in *GsPPCK3-SCMRP* transgenic alfalfa under alkali stress. As expected, we demonstrated that *GsPPCK3-SCMRP* transgenic lines displayed higher methionine content than wild type alfalfa. Taken together, results presented in this study supported the positive role of *GsPPCK3* in plant response to alkali stress, and provided an effective way to simultaneously improve plant alkaline tolerance and methionine content, at least in legume crops.

**Citation:** Sun M, Sun X, Zhao Y, Zhao C, DuanMu H, et al. (2014) Ectopic Expression of *GsPPCK3* and *SCMRP* in *Medicago sativa* Enhances Plant Alkaline Stress Tolerance and Methionine Content. PLoS ONE 9(2): e89578. doi:10.1371/journal.pone.0089578

**Editor:** John R. Battista, Louisiana State University and A & M College, United States of America

**Received:** October 14, 2013; **Accepted:** January 21, 2014; **Published:** February 25, 2014

**Copyright:** © 2014 Sun et al. This is an open-access article distributed under the terms of the Creative Commons Attribution License, which permits unrestricted use, distribution, and reproduction in any medium, provided the original author and source are credited.

**Funding:** This work was supported by Heilongjiang Provincial Higher School Science and Technology Innovation Team Building Program (2011TD005); National Natural Science Foundation of China (31171578); National Major Project for Cultivation of Transgenic Crops (2011ZX08004-002); Scientific Research Foundation of Graduate School of Heilongjiang Province (YJSCX2012-047HLJ) and National Science Foundation for Fostering Talents in Basic Research of China (J1210069). The funders had no role in study design, data collection and analysis, decision to publish, or preparation of the manuscript.

**Competing Interests:** The authors have declared that no competing interests exist.

\* E-mail: ymzhu2001@neau.edu.cn

☛ These authors contributed equally to this work.

## Introduction

As a versatile crop, alfalfa (*Medicago sativa* L.) is used for pasture, hay, silage and green-chop, and acts in crop rotation through its positive effects on soil fertility and soil structure [1]. Due to its versatility, high productivity, high feed value and potential roles in soil improvement and soil conservation, alfalfa is grown over a wide range of climatic conditions [1,2]. However, environmental challenges, especially soil salinity and alkalinity, not only seriously restrict alfalfa yield, but also affect nodules formation and symbiotic nitrogen-fixation capacity [3]. With the global climate change and the global shrinkage of arable lands, a grimmer reality of soil salinity and alkalinity is painted, hence more and more attentions have been paid to exploring alfalfa cultivation on marginal lands.

As reported earlier, of the 831 million hectares salt-alkali soils on the world, saline and alkaline soils underline 397 (47%) and 434 (53%) million hectares, respectively [4,5]. What's worse, in northeast China, over 70% of land area is alkaline grassland [6]. Alkaline soil is characterized by high pH, high exchangeable sodium, poor fertility, dispersed physical properties and low water

content [7]. Recently, a handful of researches suggested that, compared with salt stress, alkaline stress always caused much stronger inhibition of plant growth and development [8]. Unfortunately, until now, little attention has been paid on the molecular mechanisms of plant adaptation to alkaline stress.

Phosphoenolpyruvate carboxylase (PEPC; EC4.1.1.31) is a kind of tightly controlled cytosolic enzyme which functions in carbon fixation during photosynthesis [9–11]. PEPC kinase (PPCK) controls the phosphorylation state and bioactivity of PEPCs. In recent years, PPCK genes have been identified in different higher plants, including two for *Arabidopsis* [12], three for rice [13], and four for soybean [14]. Recently, several lines of direct evidence supported that PEPCs and PPCKs fulfilled important non-photosynthetic functions, particularly in plant response to environmental challenges. One of the best studied examples was that salt stress remarkably increased PPCK activity [15–17]. Further investigation revealed that salt stress not only increased PPCK gene expression levels but also decreased PPCK protein degradation rates [17]. Moreover, PEPC/PPCK activity in *Arabidopsis* and poplar was also regulated by alkali stress [12,18].

Besides high stress tolerance, another important desired trait for alfalfa is high nutritional value in terms of essential amino acids. As we know, legume plants are deficient in the sulfur-containing amino acids, namely, methionine and cysteine [19]. Methionine is nutritionally essential for mammals, but at low levels in legume. Unlike plants, mammals could not synthesize methionine; hence they have to obtain it from their diets. In this respect, methionine deficiency obviously limited the nutritional value of legumes; therefore, increasing the methionine content has become another important goal for legumes breeding. To solve this problem, in a previous study, we designed and synthesized the *SCMRP* gene according to the maize methionine-rich 10 ku zein protein [20,21]. A similar study reported that overexpression of the maize 10 ku zein gene increased the sulphur-containing amino acids of transgenic potato [22].

For these reasons, in this study, we aimed to generate the transgenic alfalfa not only with higher alkali tolerance but also with higher methionine content. Based on the *Glycine soja* (G07256) microarray data, we isolated and characterized an alkali stress responsive gene *GsPPCK3*. Our results demonstrated that *GsPPCK3* overexpression in alfalfa improved plant tolerance to alkali stress. In this case, we co-transformed the *GsPPCK3* and *SCMRP* genes into alfalfa, and demonstrated that the transgenic alfalfa displayed not only higher alkali tolerance but also higher methionine content. Taken together, results presented in this study demonstrated the biological function of *GsPPCK3* under alkali stress, and provided an effective way to simultaneously improve plant alkaline tolerance and methionine content, at least in legume crops.

## Results

### Isolation and Sequence Analysis of the *GsPPCK3* Gene

In a previous study, we constructed a transcriptional profile of *Glycine soja* (G07256) roots and leaves in response to salt-alkali stress (50 mM NaHCO<sub>3</sub>, pH 8.5), by using the Affymetrix® Soybean Genome Array [23]. Three PEPC kinase genes *GsPPCK1*, *GsPPCK2* and *GsPPCK3* were identified as potential stress responsive genes (Fig. 1). Contrarily, the last PPCK gene *GsPPCK4* essentially did not respond to salt-alkali stress, only with an increase at 6 h in leaves.

In this study, we obtained the full length coding region of *GsPPCK3* by using homologous cloning strategy. *GsPPCK3* contained a complete open reading frame (ORF) of 915 bp encoding 304 amino acids with an estimated molecular weight (Mr) of 34 000 and a theoretical pI of 5.35. A BLASTP search at NCBI showed that GsPPCK3 shared 90%, 84%, 69% and 61% sequence identity with the *Glycine max* GmPPCK3 (GeneBank Accession: NP\_001238645), GmPPCK2 (NP\_001236660), GmPPCK1 (NP\_001241581) and GmPPCK4 (NP\_001237016), respectively. It is worth noting that GsPPCK3 contained a 30 amino acid length sequence (KLLLASVFLFDIIIFGGFCVD-GIFGCFVFG) at its C-terminus, which did not exist in any soybean and Arabidopsis PPCKs. By comparing the DNA and mRNA sequences of *GsPPCK3* and *GmPPCK3*, we found that this 30 aa sequence was encoded by the 90 bp length intron of *GmPPCK3*.

In order to get better understanding of GsPPCK3 structure, we compared the amino acid sequences of GsPPCK3 with PPCK homologs from *Glycine max* and *Arabidopsis thaliana* (AtPPCK1 and AtPPCK2) (Fig. 2). Protein sequence analysis revealed that GsPPCK3 comprised a minimal Ser/Thr kinase domain, closely related to the catalytic domain of plant calcium-dependent protein kinases (CDPKs) without the N- and C-terminal extensions.

GsPPCK3 contained all of the 11 conserved subdomains required for kinase activity [24,25] (Fig. 2), along with a protein kinase ATP-binding signature (GxGxxG, residues 16–21) and a Ser/Thr kinase active site signature (VAHRDIKPDNILF, residues 128–140) [26]. Similar to other PPCKs, GsPPCK3 also contained a conserved G-T/S-XX-Y/F-X-APE motif in subdomain VIII, indicating that GsPPCK3 was a potential Ser/Thr kinase rather than a Tyr kinase [27]. Second structure prediction revealed that GsPPCK3 contained two transmembrane domains at the C-terminus (residues 189–207, and residues 263–289), implying the potential membrane localization.

### Expression Patterns of *GsPPCK3* in Response to Alkaline Stress and in Different Tissues

In an attempt to verify the induced expression of *GsPPCK3* under alkali stress, we carried out the quantitative real-time PCR analyses. Consistent with the microarray data, *GsPPCK3* expression in both leaves and roots of *Glycine soja* seedlings was greatly and rapidly induced by alkali stress (Fig. 3A). After 50 mM NaHCO<sub>3</sub> (pH8.5) treatment, *GsPPCK3* displayed an obvious increase and reached a maximum point at 1 h. It is noteworthy that the induction degree of *GsPPCK3* in roots was significantly higher than that in leaves. The possible reasons for the stronger response might be that plant roots were the exact sites of perception and injury for stresses, or there were different response mechanisms for *GsPPCK3* expression between roots and leaves. Anyway, it is obvious that *GsPPCK3* expression was greatly induced by alkali stress, suggesting an important role of *GsPPCK3* in plant response to alkali stress.

In order to get better understanding of *GsPPCK3* expression patterns, we further investigated the spatial specific expression of *GsPPCK3* in *Glycine soja* seedlings (Fig. 3B). The real-time PCR results showed that, among the eight tissues detected in this study, *GsPPCK3* displayed the highest expression level in leaves, which could be explained by the important role of *GsPPCK3* in photosynthesis. Contrarily, the *GsPPCK3* transcript level in roots was relatively lower, even though it exhibited a greater degree of alkali stress induction in roots. This difference led us to propose the possibility of different mechanisms and different roles of *GsPPCK3* between roots and leaves in plant response to alkali stress.

### *GsPPCK3* Overexpression Confers Enhanced Alkaline Tolerance in Transgenic Alfalfa

The stress induced expression of *GsPPCK3* gave us an insight into its potential role in response to alkali stress. To precisely investigate the biological and physiological function of *GsPPCK3* under alkaline stress, we transformed *GsPPCK3* into the wild type (WT) *M. Sativa* through the *Agrobacterium tumefaciens*-mediated transformation strategy (Figure S1A). By using PCR and semi-quantitative RT-PCR analyses, we identified a total of nine transgenic lines (Fig. 4A), and two of them, with relatively higher expression levels (3–16 and 3–26), were selected to examine the response to alkaline stress.

Under control conditions, transgenic lines showed no obvious differences in growth performance compared with WT. After 50 or 100 mM NaHCO<sub>3</sub> treatment for 14 d, both the WT and transgenic lines showed growth retardation in a dose-dependent manner. However, the growth inhibition of transgenic lines was less severe than that of WT (Fig. 4B). In details, WT plants exhibited severe chlorosis and even death, whereas the transgenic lines maintained continuous growth after 100 mM NaHCO<sub>3</sub> treatment.

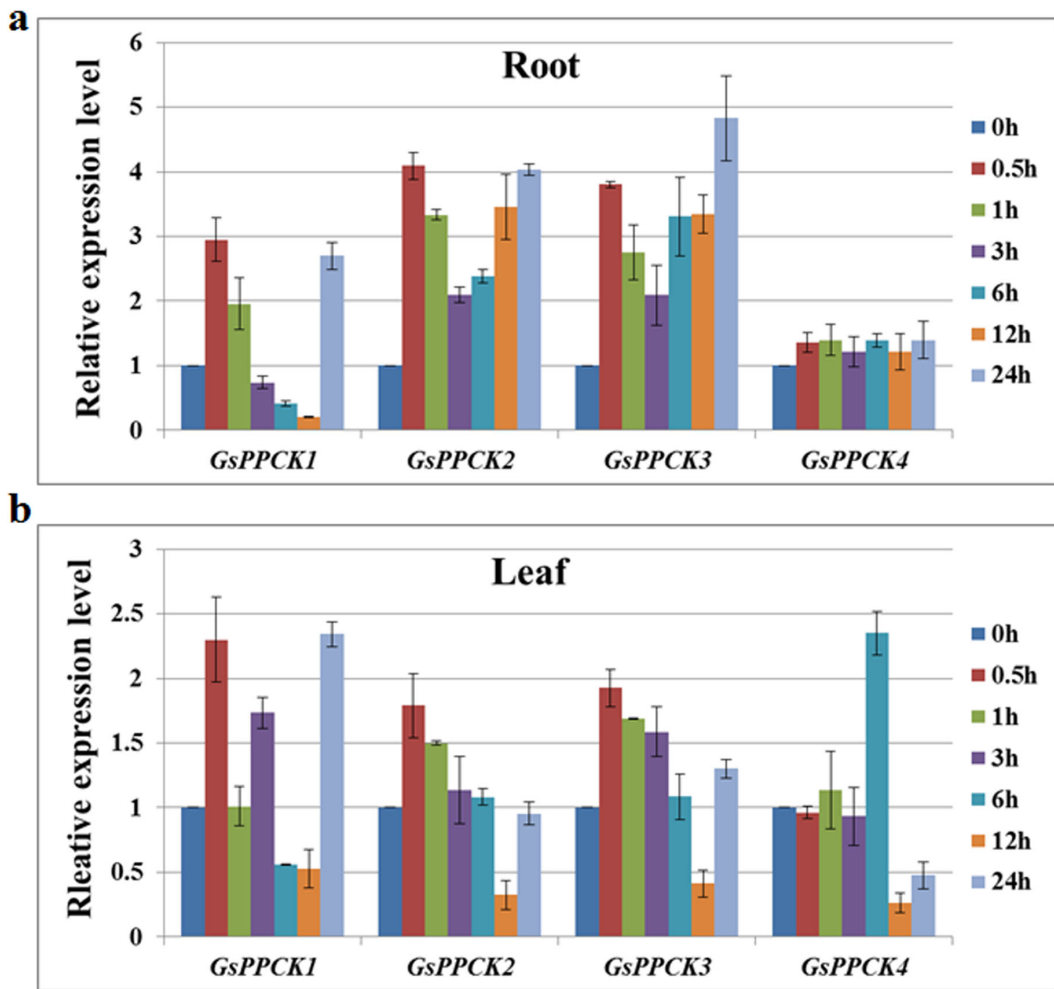

**Figure 1. Expression patterns of the *Glycine soja* PPCK family genes under 50 mM NaHCO<sub>3</sub> (pH 8.5) treatment based on the microarray data.** a. Expression patterns of the PPCK family genes under alkali stress in *Glycine soja* roots. b. Expression patterns of the PPCK family genes under alkali stress in *Glycine soja* leaves. doi:10.1371/journal.pone.0089578.g001

We further compared the relative membrane permeability (Fig. 4C), MDA content (Fig. 4D), chlorophyll content (Fig. 4E) and root activity (Fig. 4F) of WT and *GsPPCK3* transgenic lines, respectively. No obvious differences were observed between WT and transgenic lines under control condition. As expected, alkali stress significantly increased the relative membrane permeability and MDA content, but decreased the total chlorophyll content and root activity of both WT and transgenic plants. However, the transgenic lines showed relatively lower levels of electrolyte leakage and MDA content (Fig. 4C, D), but higher levels of total chlorophyll content and root activity than WT (Fig. 4E, F) (\* $P < 0.05$ ; \*\* $P < 0.01$  by Student's t-test). Taken together, these results strongly suggested that *GsPPCK3* overexpression improved the alkali tolerance of transgenic alfalfa.

#### Increased Alkaline Tolerance of *GsPPCK3*-SCMRP Overexpression Transgenic Alfalfa

Considering the deficiency in sulfur-containing amino acids, we then co-transformed the *GsPPCK3* and *SCMRP* genes into *M. Sativa* (Fig. S1B), in an attempt to obtain the transgenic alfalfa with not only higher stress tolerance but also higher methionine content. We identified a total of four transgenic lines by using PCR and

semi-quantitative RT-PCR assays (Fig. 5A). Based on western blot analysis, two transgenic lines (PS-2 and PS-31) were selected for further studies (Fig. 5B).

We firstly compared the alkali tolerance between WT and *GsPPCK3*-SCMRP transgenic alfalfa. As shown in Fig. 5C, alkali stress obviously inhibited the growth of both WT and transgenic plants; however, transgenic lines displayed significantly taller (Fig. 5D) and more biomass accumulation than WT (Fig. 5E). Specifically, in the presence of 150 mM NaHCO<sub>3</sub>, the shoot length was 29.14 cm for WT, 32.31 cm for PS-2 and 32.72 cm for PS-31, and the shoot/root weight was 1.46/0.81 g for WT, 1.91/1.08 g for PS-2 and 1.9/1.08 g for PS-31, respectively (\* $P < 0.05$ ; \*\* $P < 0.01$  by Student's t-test). These results suggested that *GsPPCK3* and *SCMRP* co-transformation promoted seedling growth of the transgenic alfalfa under alkali stress.

#### Improvement of PEPC Activity, Photosynthetic Rate and Citric Acid Content in Transgenic Alfalfa

To further elucidate the influence of *GsPPCK3* overexpression in alfalfa, PEPC activity, which was regulated by PPCK phosphorylation [28,29], was determined by measuring the seedling crude extracts. As shown in Fig. 6A, alkaline stress improved the PEPC

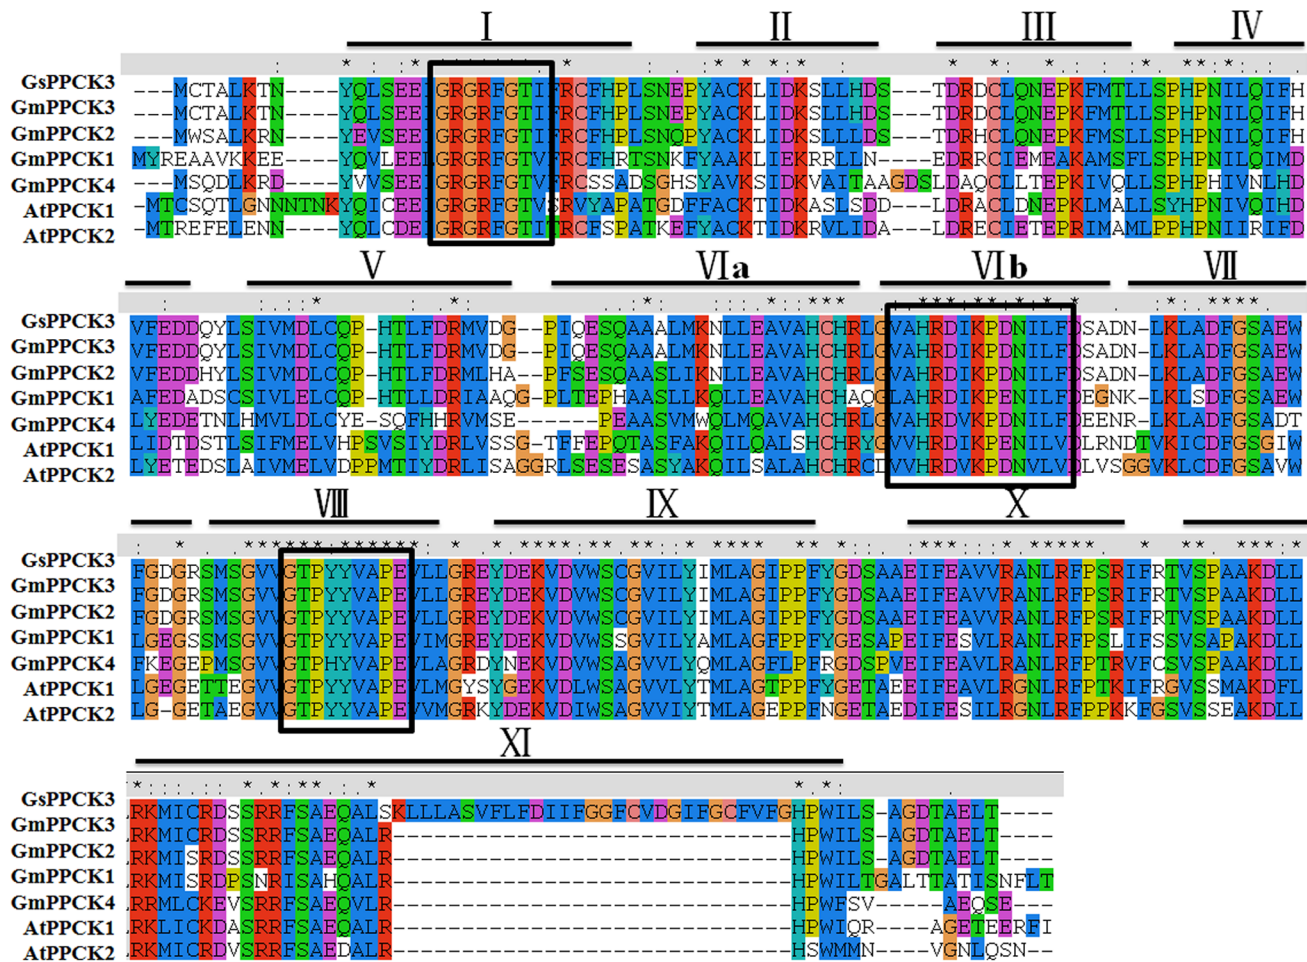

**Figure 2. Multiple alignment between GsPPCK3 and homologous PPCKs from Arabidopsis and soybean based on the full-length amino acid sequences.** The 11 subdomains of the catalytic domain were marked as solid lines. The protein kinase ATP-binding signature (GxGxxG), the Ser/Thr kinase active site signature (VAHRDIKPDNILF) and the conserved G-T/S-XX-Y/F-X-APE motif were marked as black solid boxes. Sequences were aligned by using ClustalW, and gaps were introduced to maximize alignment. doi:10.1371/journal.pone.0089578.g002

activity in both WT and transgenic lines, however, an obvious up-regulation of PEPC activity was observed in the transgenic lines. Specifically speaking, PEPC activity of the transgenic lines was 31.64% (PS-2) and 34.78% (PS-31) higher than that of WT, respectively (\* $P < 0.05$ ; \*\* $P < 0.01$  by Student's  $t$ -test).

It has been suggested that photosynthetic rate decreased proportionally, along with the increase of  $\text{NaHCO}_3$  concentration [30]. Considering the function of PEPC/PPCK in photosynthesis, we measured the net photosynthesis (Pn) rates of both WT and transgenic lines under alkali stress. The quantitative analysis revealed that Pn of transgenic alfalfa was significantly higher than that of WT, in the presence of 100 or 150 mM  $\text{NaHCO}_3$  (Fig. 6B) (\* $P < 0.05$ ; \*\* $P < 0.01$  by Student's  $t$ -test). These results suggested that overexpression of *GsPPCK3* led to an obvious increase of Pn under alkali stress, maybe by activating PEPCs.

Citric acid content was considered to be an indicator of plant response to pH challenge resulting from alkaline stress [31]. As expected, plants accumulated more citric acids under alkali stress than under control conditions. Compared with WT, the transgenic lines exhibited significantly higher levels of citric acid content, after 100 or 150 mM  $\text{NaHCO}_3$  treatment (Fig. 6C) (\* $P < 0.05$ ; \*\* $P < 0.01$  by Student's  $t$ -test). Collectively, these results demonstrated that the alleviation of high pH damage caused by alkali stress in

transgenic alfalfa might be related to the elevated levels of PEPC activity, photosynthetic rate and citric acid content, due to *GsPPCK3* overexpression.

### *GsPPCK3* Overexpression Up-regulated the Expression Levels of Several Stress Responsive Genes

Previous studies showed that  $\text{H}^+$ -ATPase and NADP-ME maintained the homeostasis of the cytosolic pH value [32,33]. In view of the increased PEPC activity and citric acid content of transgenic alfalfa, we examined the expression patterns of *PEPC*, *CS* (Citrate synthase), *H<sup>+</sup>-ATPase* and *NADP-ME* after 100 mM  $\text{NaHCO}_3$  treatment. The real-time PCR analysis indicated that expression of *PEPC*, *CS*, *H<sup>+</sup>-ATPase* and *NADP-ME* was induced by alkali stress in both WT and transgenic lines. Expectedly, the expression levels in transgenic plants were significantly higher than that in WT (Fig. 6D-G), which explained the up-regulation of the PEPC activity and citrate acid content. These results implied that *GsPPCK3* overexpression promoted the accumulation of transcript expression levels of the stress responsive genes, which might be helpful for the intracellular pH regulation under alkali stress.

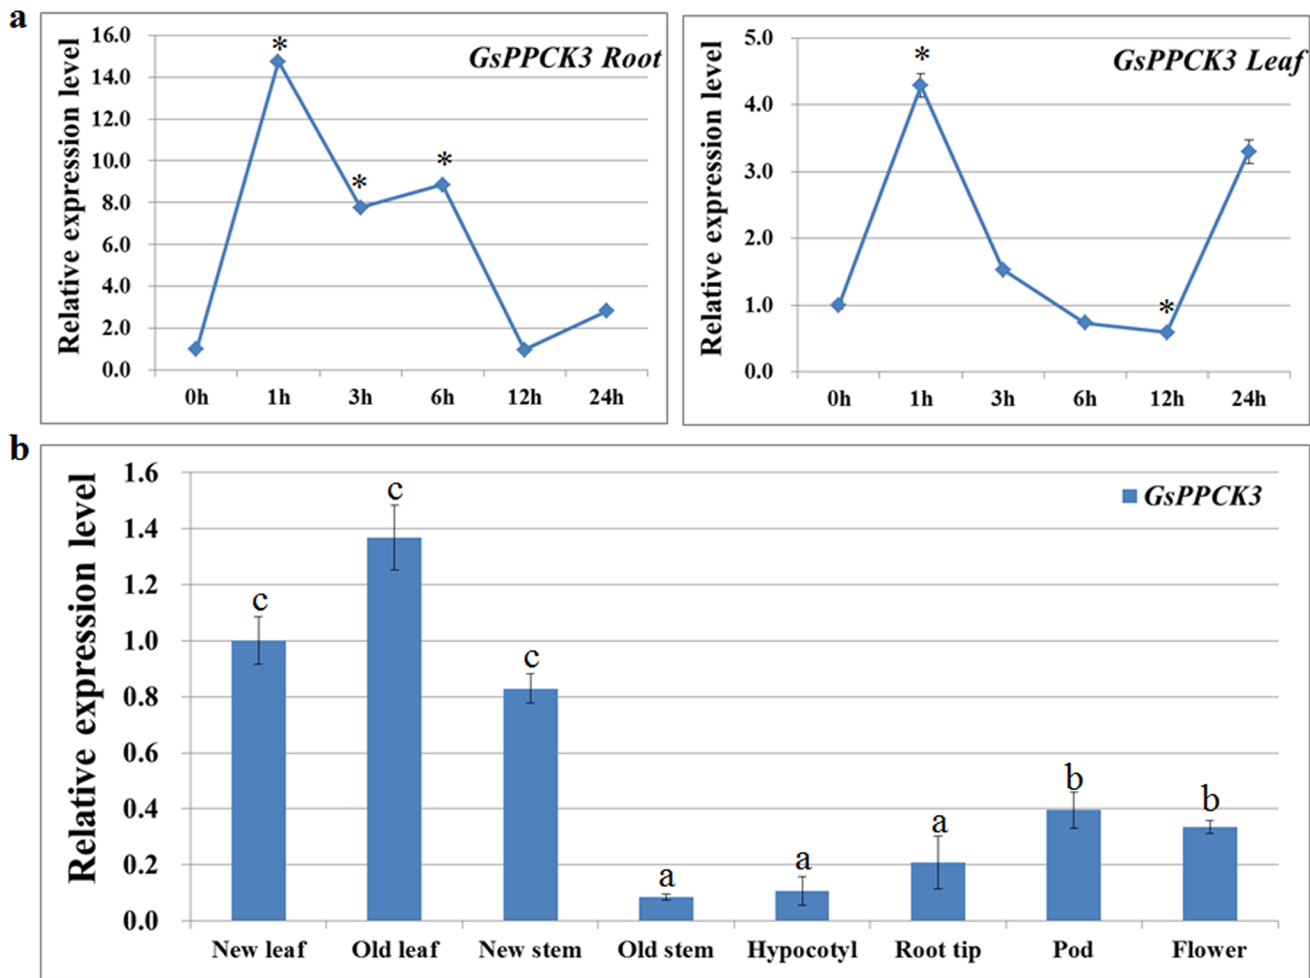

**Figure 3. Expression patterns of *GsPPCK3* in *Glycine soja*.** a. Expression levels of *GsPPCK3* were up-regulated by alkali stress in both roots and leaves. Total RNA was extracted from leaves and roots of the 3-week-old *Glycine soja* seedlings treated with 50 mM NaHCO<sub>3</sub> (pH 8.5) for the indicated time points, respectively. Relative transcript levels were determined by quantitative real-time PCR analysis with *GAPDH* as an internal control. The mean values from three fully independent biological repeats and three technical repeats were shown. \* $P < 0.05$ ; \*\* $P < 0.01$  by Student's *t*-test. b. Tissue expression specificity of *GsPPCK3* in *Glycine soja*. Total RNA was extracted from different tissues of *Glycine soja* seedlings. Significant differences ( $P < 0.05$  by Duncan's Multiple Range Test) were indicated by different lowercase letters. doi:10.1371/journal.pone.0089578.g003

### Increased Methionine Content in Leaves of *GsPPCK3*-SCMRP Transgenic Alfalfa

In addition to the enhanced alkali tolerance, we also determined the content of 16 amino acids in leaves of both WT and transgenic plants, to verify if *GsPPCK3*-SCMRP co-transformation increased the methionine content (Table 1). As expected, *GsPPCK3*-SCMRP transgenic lines displayed significantly higher levels of methionine content than WT (\* $P < 0.05$ ; \*\* $P < 0.01$  by Student's *t*-test), without obvious changes for other amino acids. Specifically speaking, the methionine contents were  $0.97 \pm 0.04\%$  in WT plants,  $2.27 \pm 0.89\%$  (2.34 folds to WT) in transgenic line PS-2 and  $2.23 \pm 0.67\%$  (2.29 folds) in line PS-31. Taken together, these results suggested that *GsPPCK3*-SCMRP co-overexpression not only enhanced the alkaline tolerance, but also increased the methionine content of transgenic alfalfa.

### Discussion

Saline-alkaline stress, as a kind of widespread environmental stress with significantly negative impact on plant growth, severely

reduces crop productivity and affects agricultural production worldwide. It has been suggested that alkaline soil, characterized by high NaHCO<sub>3</sub>/Na<sub>2</sub>CO<sub>3</sub> content, caused injury to plants not only through salt stress, but also through alkali stress [34–36]. Plants could homeostatically maintain the intracellular pH value and ion concentration in a temperate range [32,37–39]. Unfortunately, up to now, most studies emphasized on salt stress [40–43], and no slightly definite mechanism was proposed about plant response to alkaline stress.

*Glycine soja*, the wild ancestor of cultivated soybean (*Glycine max*), could normally germinate and grow in the alkaline soil with a pH value at 9.02 [44]. In previous studies, we constructed the global transcriptional profile of *Glycine soja* (G07256) under alkali stress (50 mM NaHCO<sub>3</sub>, pH 8.5), and three of the four PPCK genes *GsPPCK1*, *GsPPCK2* and *GsPPCK3* were identified as putative stress responsive genes (Fig. 1) [23]. Contrarily, *GsPPCK4* essentially did not respond to alkali stress, only with an increase at 6 h in leaves. Consistent with previous researches, these results further supported the evolutionary relationship of soybean PPCKs [14,45]. *PPCK1*, *PPCK2* and *PPCK3* shared a high similarity and belonged

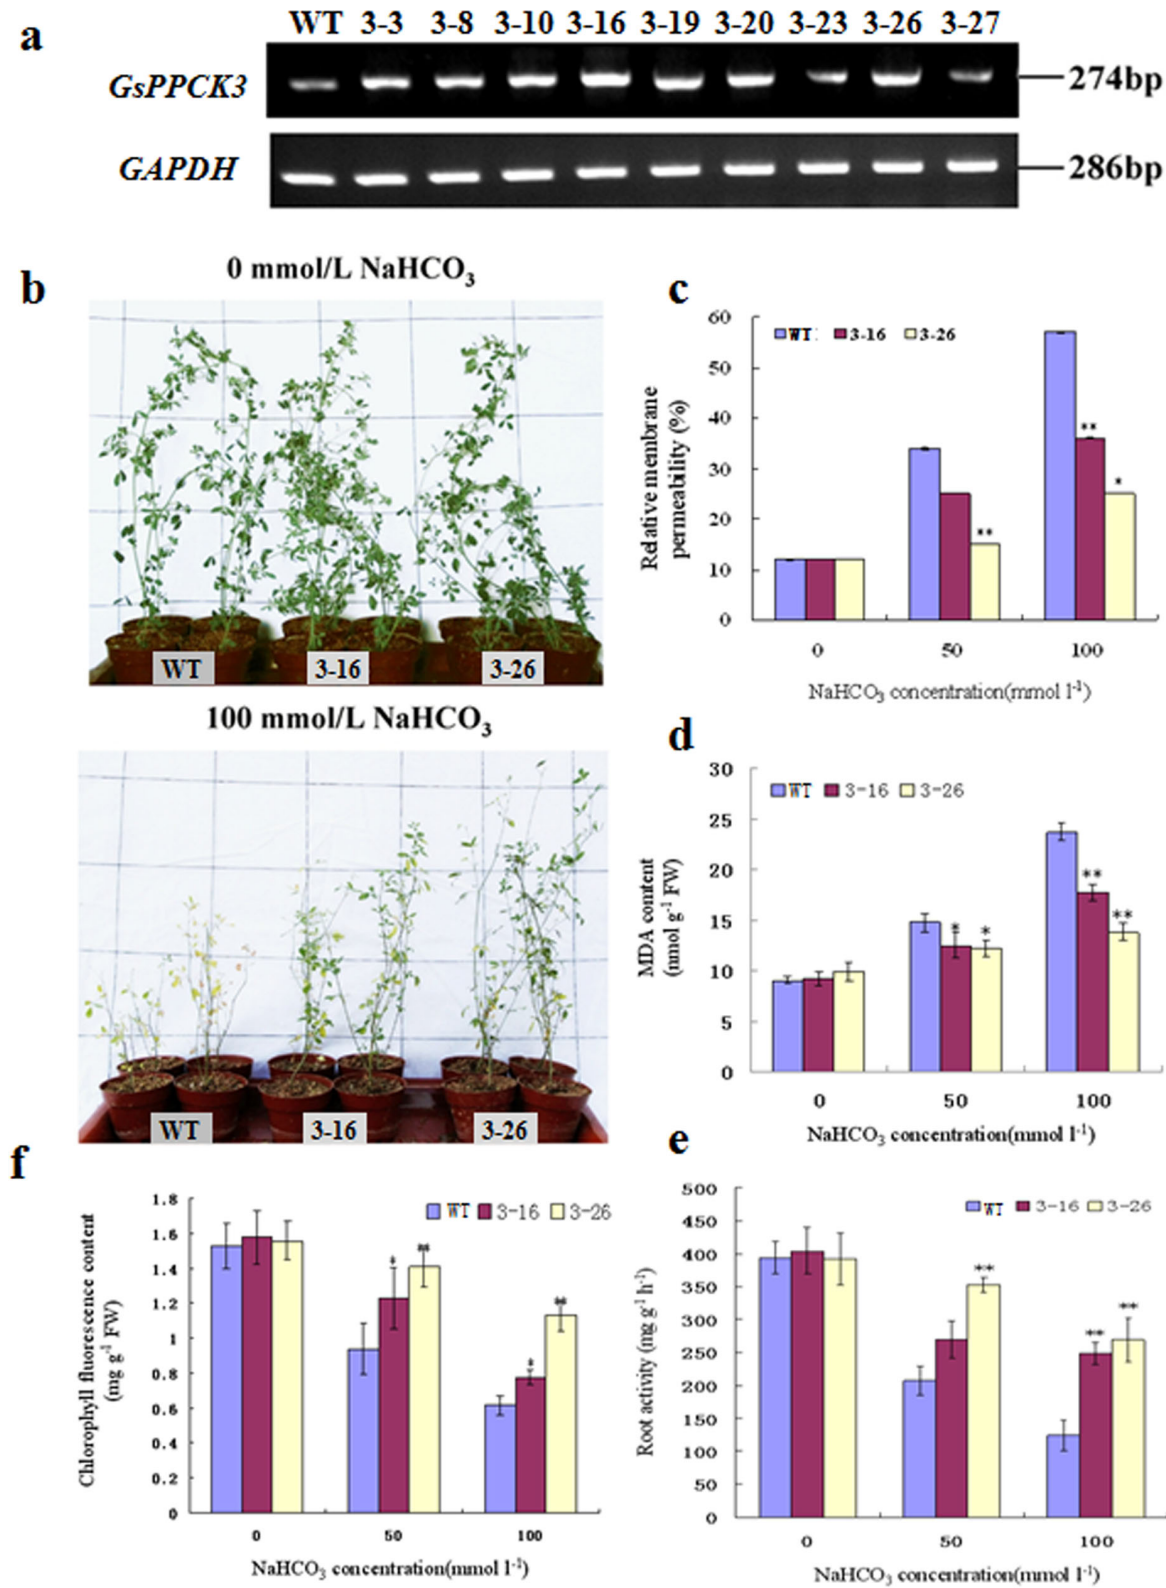

**Figure 4. *GsPPCK3* overexpression in alfalfa conferred enhanced alkaline tolerance.** **a.** Semi-quantitative RT-PCR identification of *GsPPCK3* transgenic alfalfa. **b.** Growth performance of WT and transgenic lines under control conditions or 100 mM NaHCO<sub>3</sub> treatment. Photographs were taken 12 days after initial treatment. **c.** The relative membrane permeability of WT and transgenic plants. **d.** The MDA content of WT and transgenic plants. **e.** The root activity of WT and transgenic plants. **f.** The total chlorophyll content of WT and transgenic plants. For phenotypic analysis of *GsPPCK3* transgenic alfalfa, the 3-week-old WT and *GsPPCK3* transgenic plants with similar sizes were treated with 1/8 Hoagland nutrient solution containing either 0, or 50, or 100 mM NaHCO<sub>3</sub> every 3 days for a total of 12 days. doi:10.1371/journal.pone.0089578.g004

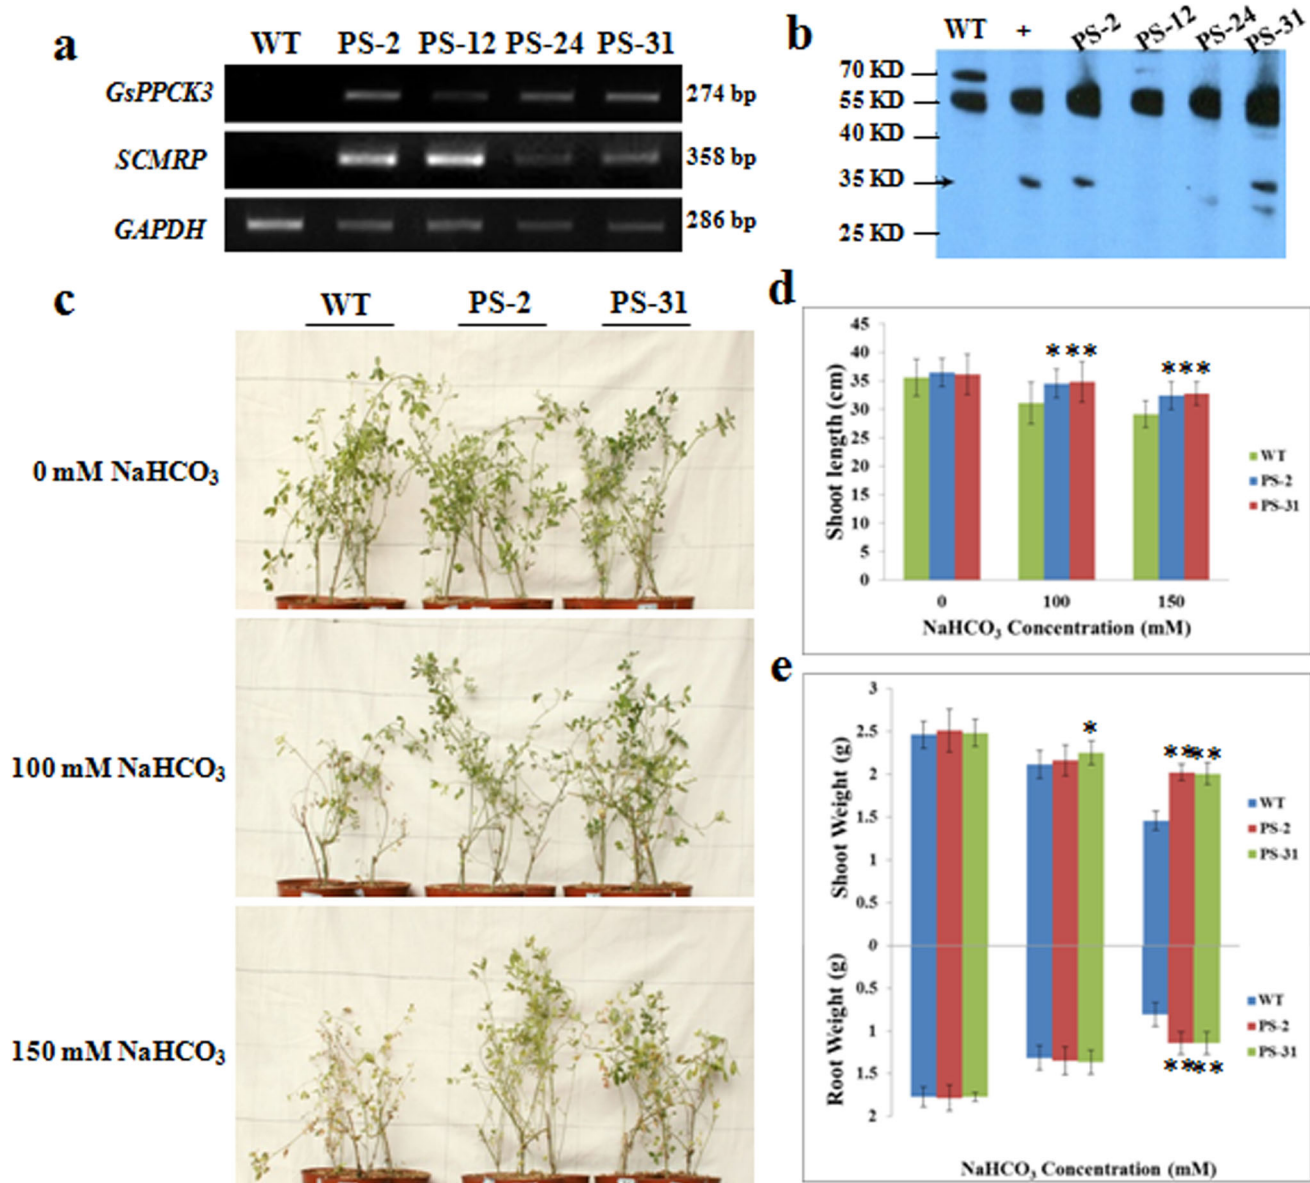

**Figure 5. Increased alkaline tolerance of *GsPPCK3-SCMRP* overexpression transgenic alfalfa.** **a.** Semi-quantitative RT-PCR analysis of *GsPPCK3* and *SCMRP* expression levels in WT and transgenic lines. **b.** Western blot identification of *GsPPCK3-SCMRP* transgenic alfalfa. **c.** Growth performance of WT and transgenic lines after alkali treatment. Photographs were taken 15 days after initial treatment. **d.** Shoot length of the WT and transgenic lines. **e.** Shoot weight and root weight of the WT and transgenic lines. For phenotypic analysis of *GsPPCK3-SCMRP* transgenic alfalfa, the 4-week-old plants were treated with 1/8 Hoagland nutrient solution containing either 0, or 100, or 150 mM NaHCO<sub>3</sub> every 3 days for a total of 15 days. doi:10.1371/journal.pone.0089578.g005

to the same legume PPCK subfamily, while *PPCK4* represented a high divergence, outlier to the legume PPCK.

In a previous study, we isolated and characterized one of the alkali stress responsive PPCK genes *GsPPCK1*, and found that overexpression of *GsPPCK1* in alfalfa significantly improved plant tolerance to alkali stress [46]. In the present study, we focused on the expression pattern and biological function of *GsPPCK3*. We cloned the full length *GsPPCK3*, and found that it shared 90%, 84%, 69% and 61% sequence identity with *GmPPCK3*, *GmPPCK2*, *GmPPCK1* and *GmPPCK4*, respectively. Protein sequence analysis revealed a unique motif consisting of 30 amino acids in subdomain XI of *GsPPCK3*, which was not found in any soybean and Arabidopsis PPCKs. This unique sequence was encoded by the 90 bp length intron of *GmPPCK3*, indicating the existence of

different transcripts in *Glycine soja*. Furthermore, *GsPPCK3* protein contained all conserved subdomains required for kinase activity [24,25] (Fig. 2), including a protein kinase ATP-binding signature, a Ser/Thr kinase active site signature [26] and a conserved G-T/S-XX-Y/F-X-APE motif, as well as two transmembrane domains.

*GsPPCK3* expression was greatly and rapidly induced by alkali stress in both leaves and roots (Fig. 3A). Previous researches also suggested the induced expression of PPCKs under environmental stress. For example, salt stress significantly increased the transcript accumulation of *SbPPCK1* and *SbPPCK2* in sorghum [17]. Moreover, *GsPPCK1* was also induced by alkali stress and positively regulated the alkali tolerance of transgenic alfalfa [46]. Therefore, the alkali induced expression indicated an important role of *GsPPCK3* in plant response to alkali stress. It is worth noting

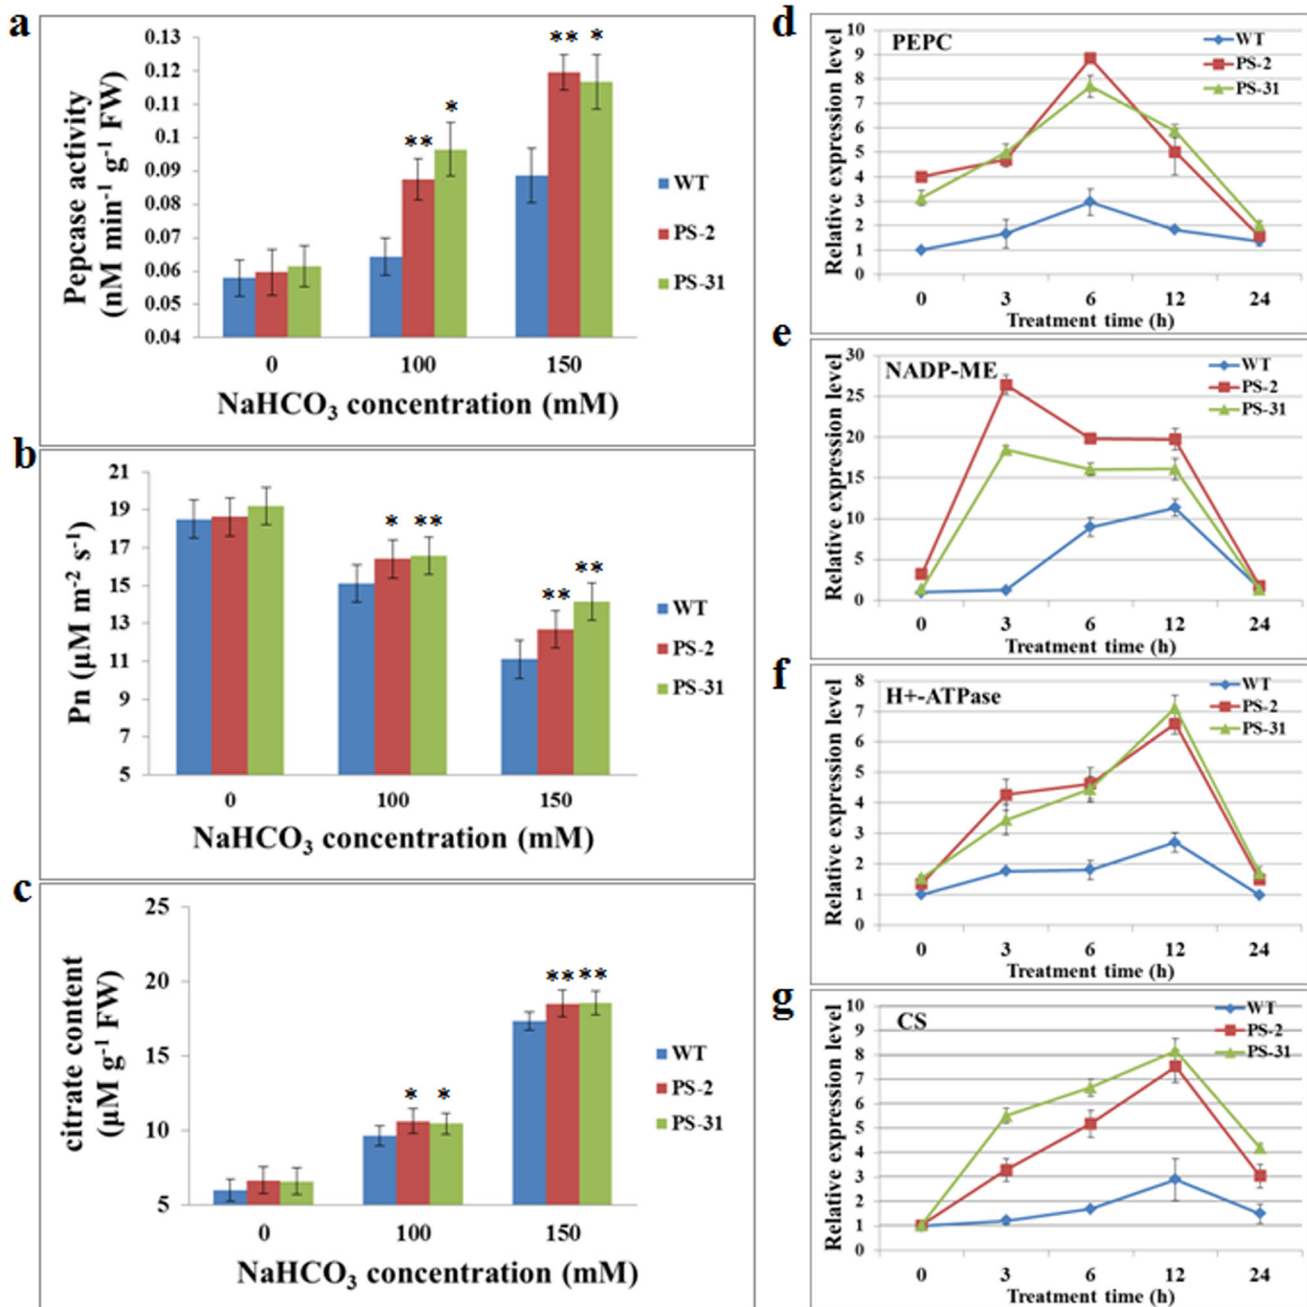

**Figure 6. *GsPPCK3* overexpression altered a set of physiological indices and expression levels of stress responsive genes.** **a.** The PEPC activity of the WT and *GsPPCK3-SCMRP* transgenic lines under alkali treatment. **b.** The net photosynthetic rate of the WT and *GsPPCK3-SCMRP* transgenic lines. **c.** The citric acid content of the WT and transgenic lines. **d.** Increased expression levels of *PEPC* in *GsPPCK3-SCMRP* transgenic plants under alkali stress (50 mM NaHCO<sub>3</sub>, pH 8.5). **e.** Increased expression levels of *NADP-ME* in *GsPPCK3-SCMRP* transgenic plants. **f.** Increased expression levels of *H<sup>+</sup>-ATPase* in *GsPPCK3-SCMRP* transgenic plants. **g.** Increased expression levels of *CS* in *GsPPCK3-SCMRP* transgenic plants. To explore expression patterns of stress-responsive genes, the 4-week-old WT and *GsPPCK3-SCMRP* transgenic seedlings after shoot cottage were treated with 50 mM NaHCO<sub>3</sub> (pH 8.5) for 0, 3, 6, 12 and 24 h, respectively. Relative transcript levels were determined by quantitative real-time PCR with *GAPDH* as internal reference, and were normalized to WT plants at 0 h. Values represented the means of three fully independent biological replicates, and three technological replicates for each. doi:10.1371/journal.pone.0089578.g006

that the stress induction degree of *GsPPCK3* in roots was significantly higher than that in leaves. It is possible that plant roots were the exact sites of perception and injury for stresses, or there were different response mechanisms for *GsPPCK3* expression between roots and leaves.

It has been reported that PPCK genes showed spatial expression specificity. For example, *OsPPCK1* and *OsPPCK3* displayed obviously high expression levels in roots [13], while *GmPPCK2* and *GmPPCK3* showed high transcription levels in root nodules [14]. Except for root nodules, *GmPPCK3* also showed relatively higher expression levels in stems, flowers and young leaves. In this



**Table 1.** Amino acids content of the WT and *GsPPCK3-SCMRP* transgenic alfalfa.

| Amino acid | WT               | Content (%) PS-2   | PS-31             |
|------------|------------------|--------------------|-------------------|
| Asp        | 6.91±0.39        | 6.84±0.32          | 7.38±0.51         |
| Thr        | 6.48±0.00        | 6.27±0.06          | 6.40±0.06         |
| Ser        | 3.65±0.05        | 3.58±0.01          | 3.68±0.10         |
| Glu        | 8.74±0.09        | 8.69±0.01          | 8.76±0.11         |
| Gly        | 19.28±0.20       | 17.53±0.37         | 18.76±0.83        |
| Ala        | 9.40±0.07        | 9.28±0.02          | 9.38±0.27         |
| Cys        | 3.88±0.05        | 3.99±0.08          | 3.77±0.09         |
| <b>Met</b> | <b>0.97±0.04</b> | <b>2.27±0.89**</b> | <b>2.23±0.67*</b> |
| Ile        | 4.16±0.10        | 4.17±0.14          | 3.96±0.06         |
| Leu        | 8.38±0.10        | 8.49±0.18          | 8.13±0.24         |
| Tyr        | 1.53±0.27        | 1.38±0.28          | 1.14±0.19         |
| Lys        | 6.98±0.10        | 7.18±0.16          | 6.75±0.06         |
| NH3        | 1.62±0.16        | 1.80±0.14          | 1.82±0.29         |
| His        | 3.49±0.09        | 3.55±0.16          | 3.58±0.07         |
| Arg        | 4.96±0.03        | 5.00±0.07          | 4.86±0.17         |
| Pro        | 9.51±0.01        | 9.98±0.08          | 9.41±0.24         |

\*P&lt;0.05;

\*\*P&lt;0.01 by Student's t-test.

doi:10.1371/journal.pone.0089578.t001

study, we found that *GsPPCK3* displayed the highest level in leaves but relatively lower in roots (Fig. 3B). As we know, PEPC undergoes an important function in carbon fixation during photosynthesis, and its activity was largely regulated by PPCK phosphorylation [28,29]. It is reasonable to speculate that the high levels of *GsPPCK3* transcripts in leaves could make sure of the high PEPC activity and thereby the effective photosynthesis of plant leaves. Considering the difference in the transcript levels and alkali induction degrees of *GsPPCK3* between roots and leaves, one could speculate that in leaves, most *GsPPCK3* products were used for carbon fixation in photosynthesis process, but in roots, *GsPPCK3* mainly functioned in alkali response.

To further confirm the biological function of *GsPPCK3* in alkali response, we transformed *GsPPCK3* into alfalfa and carried out the alkali tolerance assays. We gave four lines of direct evidence showing the increased tolerance and possible mechanisms of *GsPPCK3* transgenic alfalfa in response to alkali stress (Fig. 4, 5). Firstly, *GsPPCK3* overexpression significantly promoted plant growth under alkali stress. *GsPPCK3* transgenic lines displayed much better at plant height, shoot weight and root weight than WT under alkali stress (Fig. 5D, E). Secondly, *GsPPCK3* overexpression alleviated the damage caused by alkali stress, as evidenced by an obvious decrease in the relative ion leakage (Fig. 4C) and MDA content (Fig. 4D), but an increase in root activity (Fig. 4E) [37,47–49]. Thirdly, *GsPPCK3* overexpression in alfalfa resulted in increased PEPC activity (Fig. 6A), increased chlorophyll content (Fig. 4F) and thereby the increased Pn rate (Fig. 6B), which in turn could promote plant growth under alkali stress. We also observed the higher expression levels of *PEPC* gene in transgenic alfalfa (Fig. 6D). In this context, we proposed the hypothesis that *GsPPCK3* regulated the PEPC activity not only through protein phosphorylation process, but also through gene transcription regulation. Finally, overexpression of *GsPPCK3* led to more effective response to high pH stress by increasing the citrate acid content (Fig. 6C) [50]. The up-regulation of *CS* gene

expression (Fig. 6G) in transgenic plants explained the increase of citrate acid content [51,52]. Meanwhile, we also suggested relatively higher expression level of *H<sup>+</sup>-ATPase* in transgenic lines under alkali stress (Fig. 6F), which was also helpful for intracellular pH regulation. Based on these results, we speculated that *GsPPCK3* regulated the gene expression and enzyme activity involved in photosynthesis and pH regulation, alleviated damage caused by alkali stress, and finally promoted plant growth under alkali stress.

On the other hand, we also obtained the transgenic alfalfa with not only higher alkali tolerance but also higher methionine content, by co-transforming the *GsPPCK3* and *SCMRP* genes. As a kind of nutritionally essential amino acid, methionine was found to be at low level in legume. In this study, we significantly improved the methionine content of transgenic alfalfa by ectopically expressing the *SCMRP* gene, which was designed and synthesized according to the maize methionine-rich 10 ku zein protein [20,21]. Similarly, it has been reported that overexpression of the maize 10 ku zein gene in potato could increase the contents of sulphur-containing amino acids [22]. During the past decades, a series of efforts have been made to increase the methionine content by using genetic engineering methods, for example altering expression levels of the methionine-rich storage proteins [53–55], or increasing the soluble content of methionine [56–60].

Collectively, here we provided an effective way to simultaneously improve plant alkaline tolerance and methionine content, at least in legume crops. For the first time, we gave exact evidence for a PPCK protein from *Glycine soja*, and provided insights into a plausible mechanism by which *GsPPCK3* positively controlled plant tolerance to alkali stress.

## Materials and Methods

### Plant Material and Growth Conditions

*Glycine soja* (G07256) seeds, obtained from Jilin Academy of Agricultural Sciences (Changchun, China), were treated with 98% sulfuric acid for 10 min, washed five times with sterile water, and then kept in complete darkness with humidity for 2–3 days to promote germination. The seedlings were transferred and grown in 1/4 Hoagland solution for 3 weeks at 24–26°C and 16 h light/8 h dark cycles. To explore the expression profiles of *GsPPCK3* under alkali stress, the 3-week-old seedlings were treated with 1/4 Hoagland solution containing 50 mM NaHCO<sub>3</sub> (pH 8.5) for 0, 1, 3, 6, 12 and 24 h, respectively. Equal amounts of leaves and roots were harvested and stored at –80°C after snap-frozen in liquid nitrogen.

*Medicago Sativa* L. was kindly obtained from Heilongjiang Academy of Agricultural Sciences (Haerbin, China), and grown in green house under controlled environmental conditions (24–26°C, 16 h light/8 h dark cycles, 600 μmol m<sup>-2</sup> s<sup>-1</sup>, 80±5% relative humidity). To investigate the expression patterns of stress-responsive genes, the 4-week-old seedlings after shoot cottage were treated with 1/4 Hoagland solution containing 50 mM NaHCO<sub>3</sub> (pH 8.5) for 0, 3, 6, 12 and 24 h, respectively. Samples were harvested and stored as described above.

### Isolation and Sequence Analysis of the *GsPPCK3* Gene

Total RNA was extracted from the 3-week-old *Glycine soja* seedlings, by using RNeasy Plant Mini Kit (Qiagen, Valencia, CA, USA), and subjected to cDNA synthesis by using SuperScript<sup>TM</sup> III Reverse Transcriptase kit (Invitrogen, Carlsbad, CA, USA). The full-length coding region of *GsPPCK3* was PCR amplified with gene specific primers (5'-AAGATAGAATGTGCACAGCCC-TAAAG-3' and 5'-TTCTCAAGTGAGTTCAGCCGTGTC-

3'), and cloned into pGEM-T vector (Promega, Madison, WI, USA) for sequencing.

Sequence similarity was examined by using the on-line BLASTP program at NCBI (<http://blast.ncbi.nlm.nih.gov/Blast.cgi>). Homology searches were executed by BLASTP at Phytozome (<http://www.phytozome.net/soybean>). TMHMM (<http://www.cbs.dtu.dk/services/TMHMM/>) and Tmpred ([http://www.ch.embnet.org/software/TMPRED\\_form.html](http://www.ch.embnet.org/software/TMPRED_form.html)) were used to predict the transmembrane domains.

### Quantitative Real-time PCR Analyses

Total RNA extraction and cDNA synthesis were operated as described above. Quantitative real-time PCR analyses were performed by using SYBR Premix ExTaq™ II Mix (TaKaRa, Shiga, Japan) on an ABI 7500 sequence detection system (Applied Biosystems, Carlsbad, CA, USA). The glyceraldehyde-3-phosphate dehydrogenase genes in *G. soja* (Accession: DQ355800) and *M. sativa* (Accession: Medtr3g085850) were used as internal references, respectively. Expression levels for all candidate genes were calculated by using the  $2^{-\Delta\Delta CT}$  method, and the relative intensities were normalized as described previously [61]. To enable statistical analysis, three fully independent biological replicates and three technical repeats were conducted. Primers used for quantitative real-time PCR were designed using Primer 5 software and listed in Table 2.

### Generation of Transgenic Alfalfa

In order to investigate the influence of *GsPPCK3* and *SCMRP* on plant stress tolerance and methionine content, we constructed the expression vectors carrying the *GsPPCK3* gene alone (Fig. S1A), and the *GsPPCK3* and *SCMRP* genes together (Fig. S1B), respectively. The *GsPPCK3* gene was inserted to the bone vector pBEOm (made in our lab) under the control of the cauliflower mosaic virus (CaMV) 35S promoter, with the binding enhancers E12 and omega. The *SCMRP* gene was under the control of double CaMV35S promoter and omega sequence. The *Bar* gene was used as the selectable marker. The recombinant vectors were introduced into *A. tumefaciens* strain EHA105, and then transformed into *M. sativa* by using the cotyledonary node method. The transformants were selected by using 0.5 mg L<sup>-1</sup> glufosinate

ammonium, and regenerated shoots were rooted on 1/2 Murashige and Skoog (MS) medium. At last, the glufosinate-positive seedlings were transplanted into soil and grown in green house under controlled conditions.

Presence of the *GsPPCK3* and *SCMRP* genes in the glufosinate-positive plants was confirmed by PCR analysis using CaMV35S promoter specific forward primer and *Bar* gene specific reverse primer (5'-CCTGTGCCTCCAGGGAC-3' and 5'-GCGGTCTGCACCATCGTC-3'). *GsPPCK3* transcript levels in the PCR-positive plants were analyzed by semi-quantitative RT-PCR analysis using gene specific primers (5'-CCCTCCTTTTCACCTCACC-3' and 5'-GAACC-GAAGTCCGCCAGT-3'). Expression levels of the *SCMRP* gene were examined by using a pair of specific primers (5'-CAG-CAGGGTCTCGCTTCACT-3' and 5'-GCAGATTC-CAATGCCACAAT-3'). The alfalfa *GAPDH* gene was used as an internal control. And the PCR- and RT-PCR positive seedlings were subjected to western blot analysis with specific polyclonal antibody to the C-terminus of GsPPCK3 protein (CHPWIL-SAGDTAELT).

### Phenotypic Analysis of Transgenic Alfalfa Under Alkali Stress

The lignified WT and transgenic alfalfa plants were propagated by stem cuttings, and about 2 weeks later, adventitious roots appeared. The seedlings were transplanted into plastic culture pots filled with a mixture of peat moss: soil (1:1; v/v), irrigated with 1/8 Hoagland nutrient solution and grown in green house under controlled conditions. For phenotypic analysis of *GsPPCK3* transgenic alfalfa, the 3-week-old WT and transgenic plants with similar sizes were exposed to alkali stress by irrigating with 1/8 Hoagland solution containing either 0, or 50, or 100 mM NaHCO<sub>3</sub> every 3 days for a total of 12 days. For phenotypic analysis of *GsPPCK3-SCMRP* transgenic alfalfa, the 4-week-old plants were exposed to alkali stress by irrigating with 1/8 Hoagland solution containing either 0, or 100, or 150 mM NaHCO<sub>3</sub> every 3 days for 15 days.

The total chlorophyll content was determined in 80% (v/v) acetone extract according to the method of Arnon [62]. The relative electrolyte leakage was measured using a conductivity

**Table 2.** Gene-specific primers used for quantitative real-time PCR assays.

| Gene name                                                                                                                                                                                                                                                                                                 | Gene ID        | Primer Sequence (5' to 3')                                          | PCR product size (bp) |
|-----------------------------------------------------------------------------------------------------------------------------------------------------------------------------------------------------------------------------------------------------------------------------------------------------------|----------------|---------------------------------------------------------------------|-----------------------|
| <i>GsGAPDH</i>                                                                                                                                                                                                                                                                                            | DQ355800       | Forward: GACTGGTATGGCATTCCGTGT<br>Reverse: GCCTCTGATTCCTCCTTGA      | 121                   |
| <i>GsPPCK3</i>                                                                                                                                                                                                                                                                                            |                | Forward: CGCAGAACAAGCCTTGAGTAAG<br>Reverse: CCACCACGAGTAGACCACCTT   | 264                   |
| <i>MtGAPDH</i>                                                                                                                                                                                                                                                                                            | Medtr3g085850  | Forward: GTGGTGCCAAGAAGGTTGTAT<br>Reverse: CTGGGAATGATGTTGAAGGAAG   | 286                   |
| <i>PEPC</i>                                                                                                                                                                                                                                                                                               | L39371.2       | Forward: CATTGGCTCGGTTGTCTCC<br>Reverse: TCTGTGCGACTTTGATGAGGTC     | 159                   |
| <i>H<sup>+</sup>-ATPase</i>                                                                                                                                                                                                                                                                               | AJ132891       | Forward: GGCAGCCCTACCTACAAGTC<br>Reverse: AGCAATCATAAAAGCACCCAAT    | 121                   |
| <i>NADP-ME</i><br><a href="http://www.ncbi.nlm.nih.gov/nucleotide/357520876?report=genbank&amp;log\$=nuc&amp;log\$=nucltop&amp;blast_rank=1&amp;RID=35MT7XMC01R">http://www.ncbi.nlm.nih.gov/nucleotide/357520876?report=genbank&amp;log\$=nuc&amp;log\$=nucltop&amp;blast_rank=1&amp;RID=35MT7XMC01R</a> | XM_003630679.1 | Forward: TAGGTGAGTTCGCTTCCTCAGC<br>Reverse: AGGTCATAGTATTCCTCCAGTTG | 133                   |
| <i>Citrate Synthase</i>                                                                                                                                                                                                                                                                                   | HM030734.1     | Forward: TCTATATGGACCTCTTCATGGTGG<br>Reverse: TGAGCTTTCGTTTCTGGCT   | 122                   |

doi:10.1371/journal.pone.0089578.t002

meter (DDSJ-308A, Shanghai, China) as described previously [63]. The malon dialdehyde (MDA) content was determined according to the protocol described by Peever et al. [64]. The biological activity of roots from alkali-treated WT and transgenic plants was assessed by measuring root dehydrogenase activity using triphenyltetrazolium chloride (TTC) reduction technique as described [65]. The citric acid content was determined by using a spectrophotometer (UV-2550, Shimadzu, Japan) at the absorbance of 490 nm, according to the method of Zhu [66].

The net photosynthesis rate was determined by using the LI-6400 chamber (LI-COR Biosciences, Lincoln, NE, USA). During the experiments, the light intensity was  $500 \mu\text{mol photons m}^{-2} \text{s}^{-1}$ , and the  $\text{CO}_2$  concentration was in the range of 350 to  $400 \mu\text{mol mol}^{-1}$ . The flow rate was adjusted to  $500 \mu\text{mol s}^{-1}$ , and the leaf temperature was maintained at  $25^\circ\text{C}$ . For statistical analysis, three independent experiments were conducted with at least 5 independent plants per genotype and experiment.

PEPC activity was measured by the coupled spectrophotometric method at 340 nm and  $30^\circ\text{C}$  as previously described by Gonzalez [67]. Total proteins of the WT and OX alfalfa leaves were extracted by using the 0.1 M Tris-HCl (pH 7.5) solution, containing 20% (v/v) glycerol, 1 mM EDTA, 10 mM  $\text{MgCl}_2$ ,  $10 \mu\text{g mL}^{-1}$  chymostatin,  $10 \mu\text{g mL}^{-1}$  bestatin,  $10 \mu\text{g mL}^{-1}$  leupeptin, 1 mM PMSF,  $1 \mu\text{g mL}^{-1}$  microcystin-L/R (L and R are two variable amino acids in the structure of microcystin), and 14 mM  $\beta$ -mercaptoethanol. Protein concentration was determined according to the method of Bradford (1976) [68]. All of the above numerical data were subjected to statistical analyses using EXCEL 2007 and/or IBM SPSS statistics 19, and analyzed by Student's T-test and/or Duncan's Multiple Range Test.

## References

- Chang S, Liu N, Wang X, Zhang Y, Xie Y (2012) Alfalfa carbon and nitrogen sequestration patterns and effects of temperature and precipitation in three agro-pastoral ecotones of northern China. *PLoS ONE* 7: e50544.
- Bagavathiannan MV, Begg GS, Gulden RH, Van Acker RC (2012) Modelling the dynamics of feral alfalfa populations and its management implications. *PLoS ONE* 7: e39440.
- Postnikova OA, Shao J, Nemchinov LG (2013) Analysis of the alfalfa root transcriptome in response to salinity stress. *Plant Cell Physiol* 54: 1041–1055.
- Jin H, Plaha P, Park JY, Hong CP, Lee IS, et al. (2006) Comparative EST profiles of leaf and root of *Lymnium chinensis*, a xerophilous grass adapted to high pH sodic soil. *Plant Sci* 170: 1081–1086.
- Wang Y, Ma H, Liu G, Xu C, Zhang D, et al. (2008) Analysis of gene expression profile of *Limnium bicolor* under  $\text{NaHCO}_3$  stress using cDNA microarray. *Plant Mol Biol Rep* 26: 241–254.
- Kawanabe S, Zhu TC (1991) Degeneration and conservation of *Aneurolepisium chinense* grassland in northern China. *Journal of Japan Grassland Science* 37: 91–99.
- Vestin JLK, Nambu K, van Hees PAW, Bylund D, Lundström US (2006) The influence of alkaline and non-alkaline parent material on soil chemistry. *Geoderma* 135: 97–106.
- Xu W, Jia L, Baluška F, Ding G, Shi W, et al. (2012) PIN2 is required for the adaptation of *Arabidopsis* roots to alkaline stress by modulating proton secretion. *J Exp Bot* 63: 6105–6114.
- Guillet C, About-Soud MAM, Le Menn A, Viron N, Pribat A, et al. (2012) Regulation of the fruit-specific PEP carboxylase *SIPPC2* promoter at early stages of tomato fruit development. *PLoS ONE* 7: e36795.
- Xu J, Fan X, Zhang X, Xu D, Mou S, et al. (2012) Evidence of coexistence of  $\text{C}_3$  and  $\text{C}_4$  photosynthetic pathways in a green-tide-forming alga, *Ulva prolifera*. *PLoS ONE* 7: e37438.
- Chollet R, Vidal J, O'Leary M (1996) Phosphoenolpyruvate carboxylase: a ubiquitous, highly regulated enzyme in plants. *Ann Rev Plant Physiol Mol Bio* 47: 273–298.
- Chen ZH, Jenkins GI, Nimmo HG (2008) pH and carbon supply control the expression of phosphoenolpyruvate carboxylase kinase genes in *Arabidopsis thaliana*. *Plant Cell Environ* 31: 1844–1850.
- Fukayama H, Tamai T, Taniguchi Y, Sullivan S, Miyao M, et al. (2006) Characterization and functional analysis of phosphoenol pyruvate carboxylase kinase genes in rice. *Plant J* 47: 258–268.
- Xu W, Sato SJ, Clemente TE, Chollet R (2007) The PEP-carboxylase kinase gene family in *Glycine max* (GmPpcK1–4): an in-depth molecular analysis with nodulated, non-transgenic and transgenic plants. *Plant J* 49: 910–923.
- Peng Y, Cai J, Wang W, Su B (2012) Multiple inter-kingdom horizontal gene transfers in the evolution of the phosphoenolpyruvate carboxylase gene family. *PLoS ONE* 7: e51159.
- García-Mauriño S, Monreal JA, Alvarez R, Vidal J, Echevarría C (2003) Characterization of salt stress-enhanced phosphoenolpyruvate carboxylase kinase activity in leaves of *Sorghum vulgare*: independence from osmotic stress, involvement of ion toxicity and significance of dark phosphorylation. *Planta* 216: 648–655.
- Monreal JA, Arias-Baldrich C, Pérez-Montaño F, Gandullo J, Echevarría C, et al. (2013) Factors involved in the rise of phosphoenolpyruvate carboxylase activity caused by salinity in sorghum leaves. *Planta* 237: 1401–1413.
- Wang HM, Wang WJ, Wang HZ, Wang Y, Xu HN, et al. (2013) Effect of inland salt-alkaline stress on  $\text{C}_4$  enzymes, pigments, antioxidant enzymes, and photosynthesis in leaf, bark, and branch chlorenchyma of poplars. *Photosynthetica* 51: 115–126.
- Avraham T, Badani H, Galili S, Amir R (2005) Enhanced levels of methionine and cysteine in transgenic alfalfa (*Medicago sativa* L.) plants overexpressing the *Arabidopsis* cystathionine  $\gamma$ -synthase gene. *Plant Biotechnol J* 3: 71–79.
- Zhai H, Bai X, Zhu YM, Chen XH (2009) Protokaryotic expression of *SCMRP* gene and preparation of polyclonal antibody. *Journal of Northeast Agricultural University* 40: 60–65.
- Kirihara JA, Petri JB, Messing J (1988) Isolation and sequence of a gene encoding a methionine-rich 10 ku zein protein from maize. *Gene* 2: 359–370.
- Li L, Liu S, Hu Y, Zhao W, Lin Z (2001) Increase of sulphur-containing amino acids in transgenic potato with 10 ku zein gene from maize. *Chinese Sci Bull* 46: 482–484.
- Ge Y, Li Y, Zhu YM, Bai X, Lv DK, et al. (2010) Global transcriptome profiling of wild soybean (*Glycine soja*) roots under  $\text{NaHCO}_3$  treatment. *BMC Plant Biol* 10: 153.
- Hanks SK, Hunter T (1995) Protein kinases 6: the eukaryotic protein kinase superfamily: kinase (catalytic) domain structure and classification. *FASEB J* 9: 576–596.
- Yang T, Chaudhuri S, Yang L, Chen Y, Poovaiah BW (2004) Calcium/calmodulin up-regulates a cytoplasmic receptor-like kinase in plants. *J Biol Chem* 279: 42552–42559.
- Hardie DG (1999) Plant protein serine/threonine kinases: classification and function. *Annu Rev Plant Physiol Mol Biol* 50: 97–131.
- Stone JM, Walker JC (1995) Plant protein kinase families and signal transduction. *Plant Physiol* 108: 451–457.
- Vidal J, Chollet R (1997) Regulatory phosphorylation of  $\text{C}_4$  PEP carboxylase. *Trends Plant Sci* 2: 230–237.

## Determination of Amino Acid Content

Leaves of WT and transgenic alfalfa were fixated at  $105^\circ\text{C}$  for 15 min, and then dried to constant weight at  $80^\circ\text{C}$ . About 100 mg dried leaves were crushed, suspended in 6 M HCl, and then hydrolyzed at  $110^\circ\text{C}$  for 22 h with nitrogen replacement. The hydrolysate was dried under reduced pressure, dissolved in 0.02 M HCl, and subjected to the amino acid analyzer (Hitachi, Japan).

## Supporting Information

**Figure S1** Schematic representation of the constructs for *Agrobacterium tumefaciens*-mediated transformation into *Medicago sativa*. a, Schematic representation of the GsPPCK3 overexpression construct. b, Schematic representation of the GsPPCK3-SCMRP overexpression construct.

(TIF)

## Acknowledgments

We thank members of the lab for discussions and comments on this manuscript. We thank Prof. Wei Ding of Northeast Agricultural University (Heilongjiang, China) for technical assistance on analyzing the net photosynthesis rate.

## Author Contributions

Conceived and designed the experiments: MZS XS YZ YMZ. Performed the experiments: MZS XS YZ WJ. Analyzed the data: YY HD CZ. Contributed reagents/materials/analysis tools: CZ YY YZ HD. Wrote the paper: MZS XS.

29. Bakrim N, Prioul JL, Deleens E, Rocher JP, Arrio-Dupont M, et al. (1993) Regulatory phosphorylation of C4 phosphoenolpyruvate carboxylase (A cardinal event influencing the photosynthesis rate in *Sorghum* and Maize). *Plant Physiol* 101: 891–897.
30. Melack JM, Kilham P (1974) Photosynthetic rates of phytoplankton in East African alkaline, saline lakes. *Limnol Oceanogr* 19: 743–755.
31. Hughes JA, West NX, Parker DM, van den Braak MH, Addy M (2000) Effects of pH and concentration of citric, malic and lactic acids on enamel, in vitro. *J Dent* 28: 147–152.
32. I Kurtz (1987) Apical Na<sup>+</sup>/H<sup>+</sup> antiporter and glycolysis-dependent H<sup>+</sup>-ATPase regulate intracellular pH in the rabbit S3 proximal tubule. *J Clin Invest* 80: 928–935.
33. Martinoia E, Rentsch D (1994) Malate compartmentation-responses to a complex metabolism. *Ann Rev Plant Physiol Mol Bio* 45: 447–467.
34. Li RL, Shi FC, Fukuda K (2010) Interactive effects of various salt and alkali stresses on growth, organic solutes, and cation accumulation in a halophyte *Spartina alterniflora* (Poaceae). *Environ Exp Bot* 68: 66–74.
35. Li RL, Shi FC, Fukuda K (2010) Interactive effects of salt and alkali stresses on seed germination, germination recovery, and seedling growth of a halophyte *Spartina alterniflora* (Poaceae). *South Afr J Bot* 76: 380–387.
36. Shi DC, Wang DL (2005) Effects of various salt-alkali mixed stresses on *Aneurolepidium chinense* (Trin.) Kitag. *Plant Soil* 271: 15–26.
37. Zhu JK (2003) Regulation of ion homeostasis under salt stress. *Curr Opin Plant Biol* 6: 441–445.
38. Oh DH, Lee SY, Bressan RA, Yun DJ, Bohnert HJ (2010) Intracellular consequences of SOS1 deficiency during salt stress. *J Exp Bot* 61: 1205–1213.
39. Wang H, Wu Z, Han J, Zheng W, Yang C (2012) Comparison of ion balance and nitrogen metabolism in old and young leaves of alkali-stressed rice plants. *PLoS ONE* 7: e37817.
40. Munns R, Tester M (2008) Mechanisms of salinity tolerance. *Annu Rev Plant Biol* 59: 651–681.
41. Charkazi F, Ramezanzpour SS, Soltanloo H (2010) Expression pattern of two sugar transporter genes (*SuT4* and *SuT5*) under salt stress in wheat. *Plant Omics J* 3: 194–198.
42. Jemaa E, Saïda A, Sadok B (2011) Impact of indole-3-butyric acid and indole-3-acetic acid on the lateral roots growth of *Arabidopsis* under salt stress conditions. *AJAE* 2: 18–24.
43. Ibraheem O, Dealtry G, Roux S, Bradley G (2011) The effect of drought and salinity on the expression levels of sucrose transporters in rice (*Oryza sativa* Nipponbare) cultivar plants. *Plant Omics J* 4: 68–74.
44. Ge Y, Zhu YM, Lv DK, Dong TT, Wang WS, et al. (2009) Research on responses of wild soybean to alkaline stress. *Pratacultural Science* 26: 47–52.
45. Sullivan S, Jenkins GI, Nimmo HG (2004) Roots, cycles and leaves. Expression of the phosphoenolpyruvate carboxylase kinase gene family in soybean. *Plant Physiol* 135: 2078–2087.
46. Wei ZW, Zhu YM, Hua Ye, Cai H, Ji W, et al. (2013) Transgenic alfalfa with *GsPPCK1* and its alkaline tolerance analysis. *Acta Agro Sin* 39: 68–75.
47. Long Y, Kong D, Chen Z, Zeng H (2013) Variation of the linkage of root function with root branch order. *PLoS ONE* 8: e57153.
48. Apel K, Hirt H (2004) Reactive oxygen species: metabolism, oxidative stress, and signal transduction. *Annu Rev Plant Biol* 55: 373–399.
49. Simon EW (1974) Phospholipids and plant membrane permeability. *New Phytol* 73: 377–420.
50. Kooten O, Snel JFH (1990) The use of chlorophyll fluorescence nomenclature in plant stress physiology. *Photosynth Res* 25: 147–150.
51. Shi DC, Yin SJ, Yang GH, Zhao KF (2002) Citric acid accumulation in an alkali-tolerant plant *Puccinellia tenuiflora* under alkaline stress. *Acta Botanica Sinica* 44: 537–540.
52. Zhang X, Wei L, Wang Z, Wang T (2013) Physiological and molecular features of *Puccinellia tenuiflora* tolerating salt and alkaline-salt stress. *J Integr Plant Biol* 55: 262–276.
53. Lee TT, Hou RC, Chen IJ, Su RC, Wang CS, et al. (2003) Enhanced methionine and cysteine levels in transgenic rice seeds by the accumulation of sesame 2S albumin. *Biosci Biotechnol Biochem* 67: 1699–1705.
54. Lee M, Toro-Ramos T, Fraga M, Last RL, Jander G (2008) Reduced activity of *Arabidopsis thaliana* HMT2, a methionine biosynthetic enzyme, increases seed methionine content. *Plant J* 54: 310–320.
55. Liu HY, Quampah A, Chen JH, Li JR, Huang ZR, et al. (2013) QTL mapping based on different genetic systems for essential amino acid contents in cottonseeds in different environments. *PLoS ONE* 8: e57531.
56. Tabe L, Molvig L, Droux M, Hell R (2010) Overexpression of serine acetyltransferase produced large increases in *O*-acetylserine and free cysteine in developing seeds of a grain legume. *J Exp Bot* 61: 721–733.
57. Hacham Y, Mattiyah I, Schuster G, Amir R (2008) Overexpression of mutated forms of aspartate kinase and cystathionine  $\gamma$ -synthase in tobacco leaves resulted in the high accumulation of methionine and threonine. *Plant J* 54: 260–271.
58. Peñagaricano F, Souza AH, Carvalho PD, Driver AM, Gamba R, et al. (2013) Effect of maternal methionine supplementation on the transcriptome of bovine preimplantation embryos. *PLoS ONE* 8: e72302.
59. Hanafy MS, Rahman SM, Nakamoto Y, Fujiwara T, Naito S, et al. (2013) Differential response of methionine metabolism in two grain legumes, soybean and azuki bean, expressing a mutated form of *Arabidopsis* cystathionine  $\gamma$ -synthase. *J Plant Physiol* 170: 338–345.
60. Nguyen HC, Hoefgen R, Hesse H (2012) Improving the nutritive value of rice seeds: elevation of cysteine and methionine contents in rice plants by ectopic expression of a bacterial serine acetyltransferase. *J Exp Bot* 63: 5991–6001.
61. Willems E, Leyns L, Vandesompele J (2008) Standardization of real-time PCR gene expression data from independent biological replicates. *Anal Biochem* 379: 127–129.
62. Daniel I Arnon (1949) Copper enzymes in isolated chloroplasts. Polyphenoloxidase in *Beta vulgaris*. *Plant Physiol* 24: 1–15.
63. Ishitani M, Xiong L, Lee H, Stevenson B, Zhu JK (1998) *HOS1*, a genetic locus involved in cold-responsive gene expression in *Arabidopsis*. *Plant Cell* 10: 1151–1161.
64. Peever TL, Higgins VJ (1989) Electrolyte leakage, lipoxygenase, and lipid peroxidation induced in tomato leaf tissue by specific and nonspecific elicitors from *Cladosporium fulvum*. *Plant Physiol* 90: 3867–3875.
65. DP Knieval (1973) Procedure for estimating ratio of live to dead root dry matter in root core samples. *Crop Science* 13: 124–126.
66. Zhu JL (2012) Quantitative determination of citrate by spectrophotometry method. *Chinese Journal of Analysis Laboratory* 31: 115–117.
67. Gonzalez DH, Iglesias AA, Andreo CS (1984) On the regulation of phosphoenolpyruvate carboxylase activity from maize leaves by L-malate. Effect of pH. *J Plant Physiol* 116: 425–434.
68. Bradford M (1976) A rapid and sensitive method for the quantitation of microgram quantities of protein utilizing the principle of protein-dye binding. *Anal Biochem* 72: 248–254.
